# Supplementary material for: An Evaluation of the Anti-Carcinogenic Response of Major Isothiocyanates in Non-Metastatic and Metastatic Melanoma Cells
Source: MDPI journal article supplement (doi:10.3390/antiox10020284), 2021-02-13
Supplement: s1 [file s1]

# An evaluation of the anti-carcinogenic response of major isothiocyanates in non-metastatic and metastatic melanoma cells

Electronic Supplementary Material

Melina Mitsiogianni<sup>1#</sup>, Sotiris Kyriakou<sup>2,3#</sup>, Ioannis Anestopoulos<sup>2,3</sup>, Dimitrios T. Trafalis<sup>4</sup>, Maria V. Deligiorgi<sup>4</sup>, Rodrigo Franco<sup>5,6</sup>, Aglaia Pappa<sup>7</sup>, Mihalis I. Panayiotidis<sup>1,2,3\*</sup>

- <sup>1</sup> Department of Applied Sciences, Northumbria University, Newcastle Upon Tyne, NE1 8ST, UK; [melina.mitsiogianni@northumbria.ac.uk](mailto:melina.mitsiogianni@northumbria.ac.uk), [m.panayiotidis@northumbria.ac.uk](mailto:m.panayiotidis@northumbria.ac.uk)
  - <sup>2</sup> Department of Electron Microscopy & Molecular Pathology, The Cyprus Institute of Neurology & Genetics, Nicosia, 2371, Cyprus; [sotirisk@cing.ac.cy](mailto:sotirisk@cing.ac.cy), [ioannisa@cing.ac.cy](mailto:ioannisa@cing.ac.cy), [mihalisp@cing.ac.cy](mailto:mihalisp@cing.ac.cy)
  - <sup>3</sup> The Cyprus School of Molecular Medicine, PO Box 23462, Nicosia, 1683, Cyprus, [sotirisk@cing.ac.cy](mailto:sotirisk@cing.ac.cy), [ioannisa@cing.ac.cy](mailto:ioannisa@cing.ac.cy), [mihalisp@cing.ac.cy](mailto:mihalisp@cing.ac.cy)
  - <sup>4</sup> Laboratory of Pharmacology, Medical School, National & Kapodistrian University of Athens, Athens, 11527, Greece; [dtrafal@med.uoa.gr](mailto:dtrafal@med.uoa.gr), [mdeligiorgi@yahoo.com](mailto:mdeligiorgi@yahoo.com)
  - <sup>5</sup> Redox Biology Centre, University of Nebraska-Lincoln, Lincoln, 68583, USA; [rodrigo.franco@unl.edu](mailto:rodrigo.franco@unl.edu)
  - <sup>6</sup> Department of Veterinary Medicine & Biomedical Sciences, University of Nebraska-Lincoln, Lincoln, 68583, USA; [rodrigo.franco@unl.edu](mailto:rodrigo.franco@unl.edu)
  - <sup>7</sup> Department of Molecular Biology & Genetics, Democritus University of Thrace, Alexandroupolis, 68100, Greece; [apappa@mbg.duth.gr](mailto:apappa@mbg.duth.gr)
- \* Correspondence: [mihalisp@cing.ac.cy](mailto:mihalisp@cing.ac.cy); Tel.: +357-22392626
- # Equally contributing authors

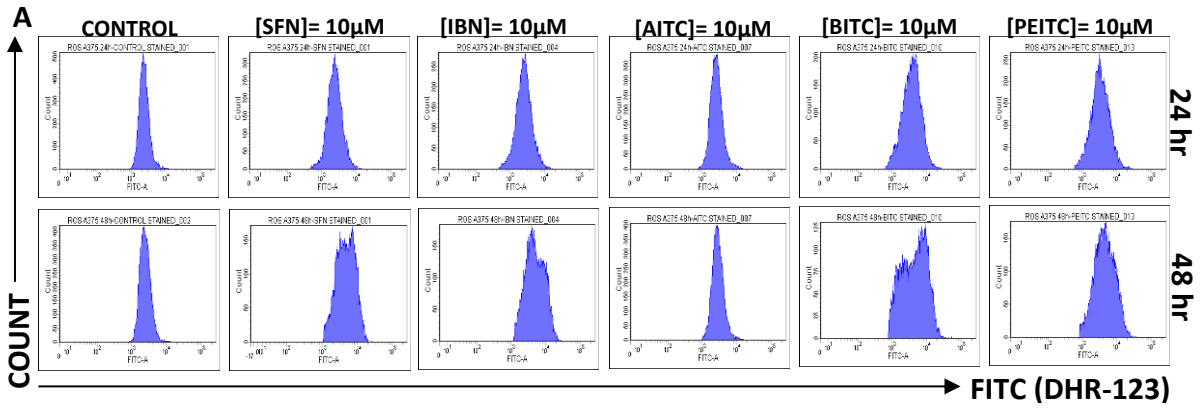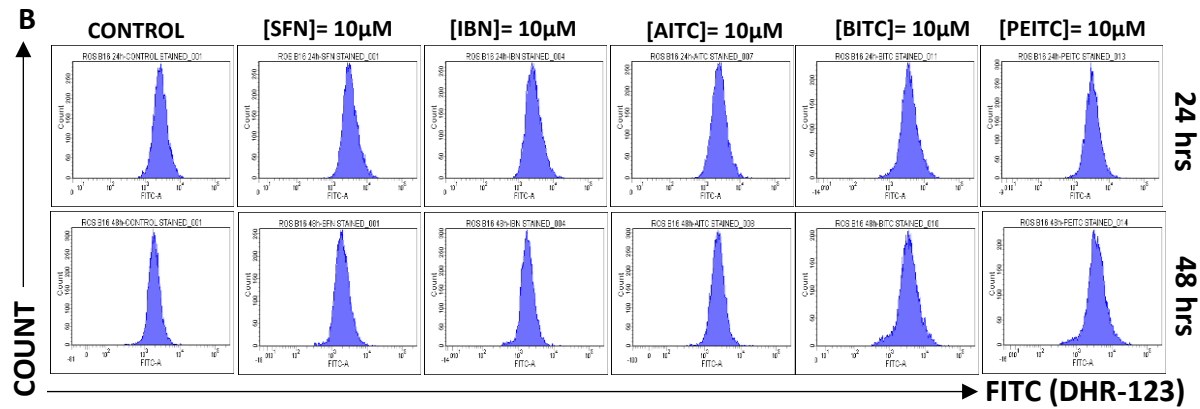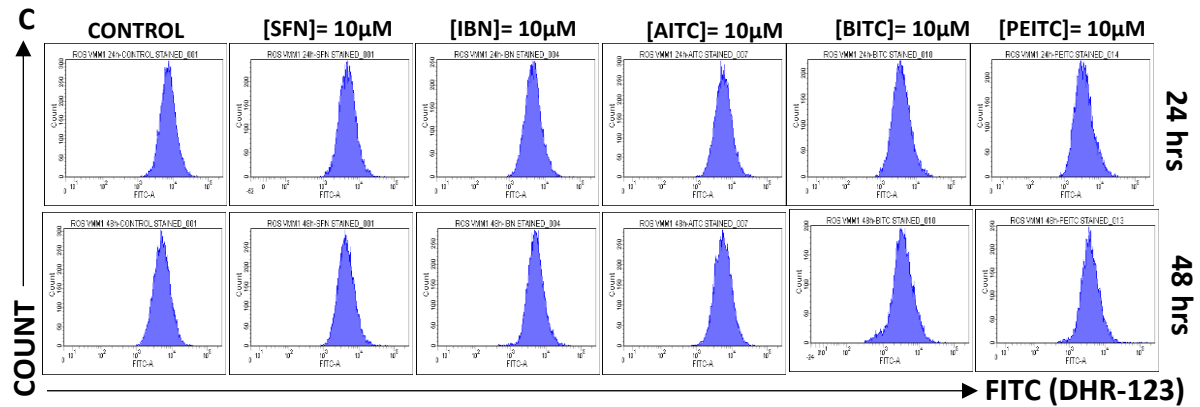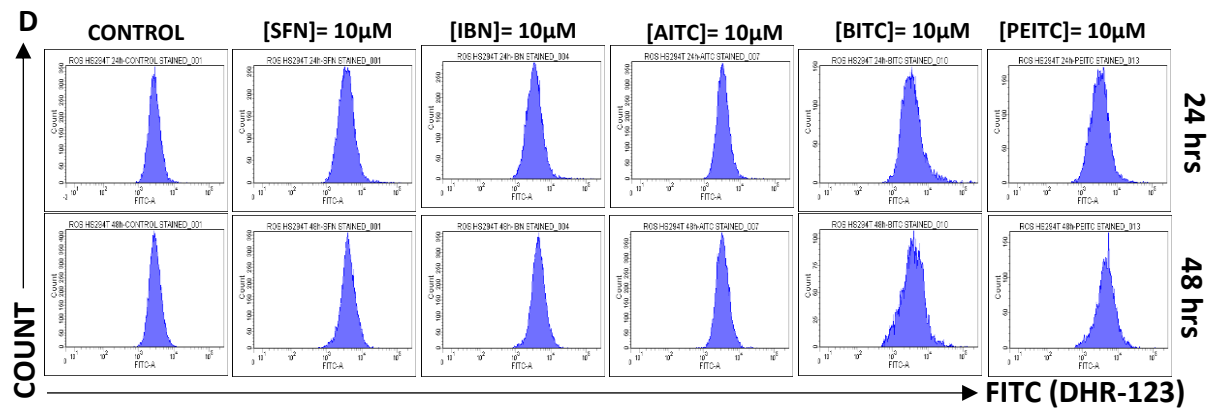

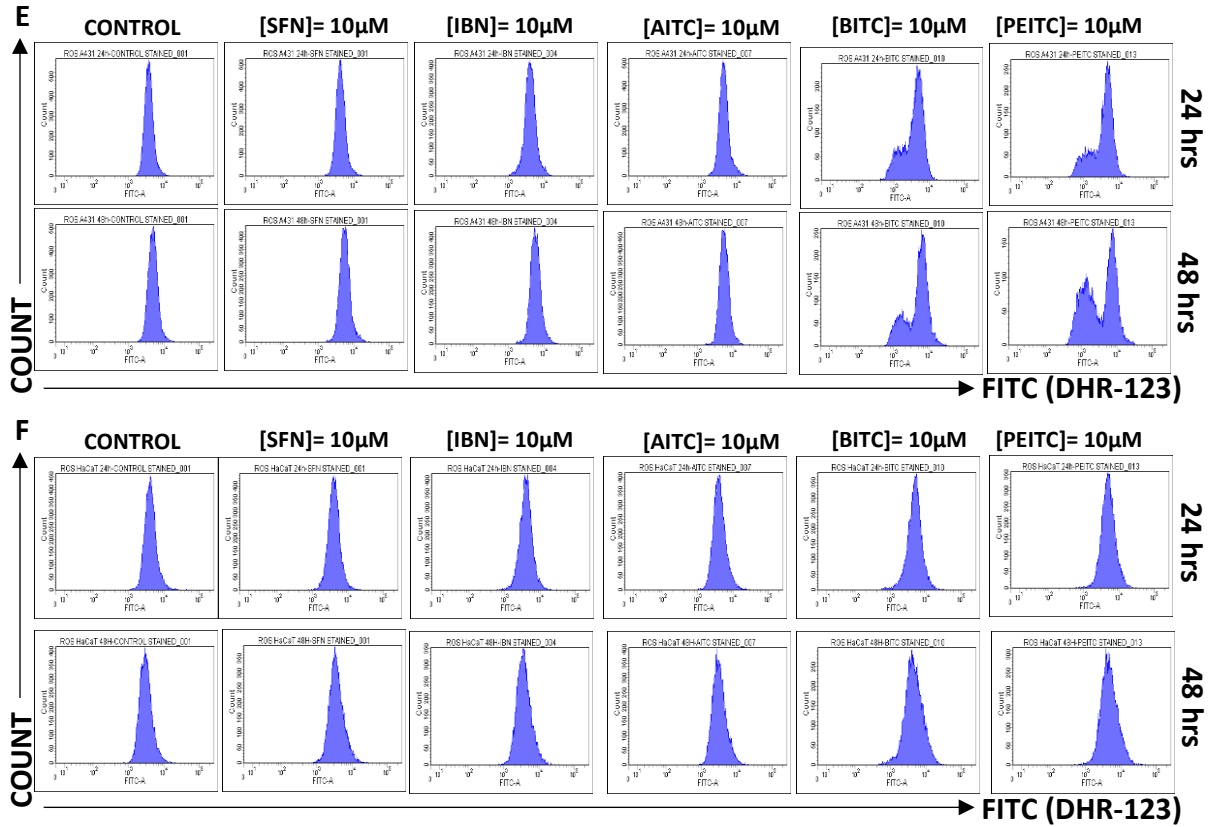

**Figure S1:** The effect of ITCs (SFN, IBN, AITC, BITC, PEITC) on ROS levels in an *in vitro* model of malignant melanoma consisting of (A) human malignant melanoma (A375), (B) murine malignant melanoma (B16F-10), (C) human brain metastatic melanoma (VMM1), (D) human lymph node metastatic melanoma (Hs 294T), (E) human non-melanoma epidermoid carcinoma (A431) and (F) human immortalized keratinocyte (HaCaT) cell lines. Cells were seeded in a 100 mm dish and next day were exposed to 10  $\mu$ M of each ITC for 24 and 48 hrs. Treated cells were incubated with the DHR-123 fluorescent probe and ROS levels were analyzed by using a FACS Canto II flow cytometer (BD Biosciences, San Jose, CA, USA). All data were compared to the respective untreated (control) samples. Representative data from three independent experiments.

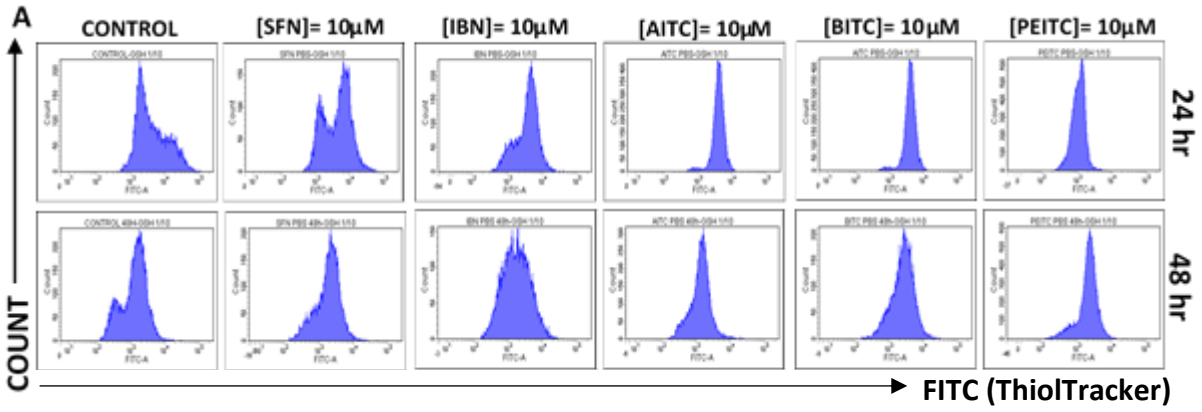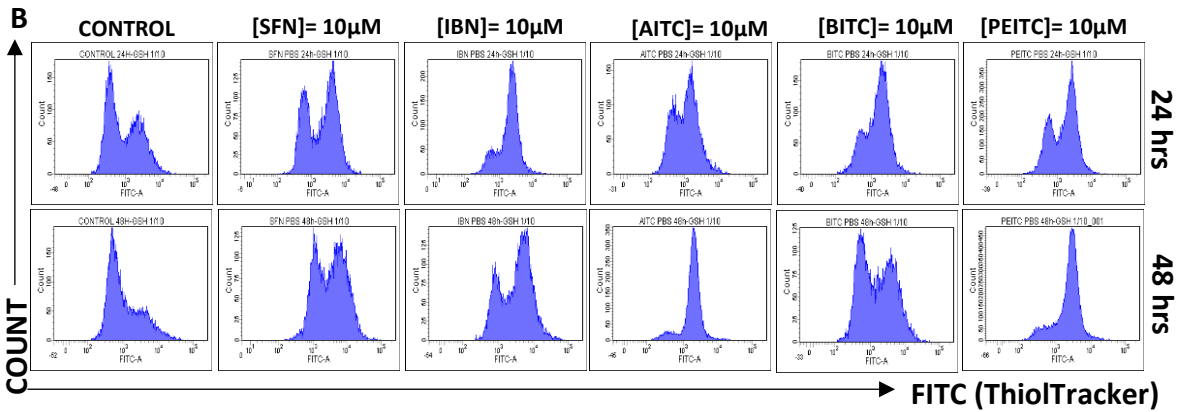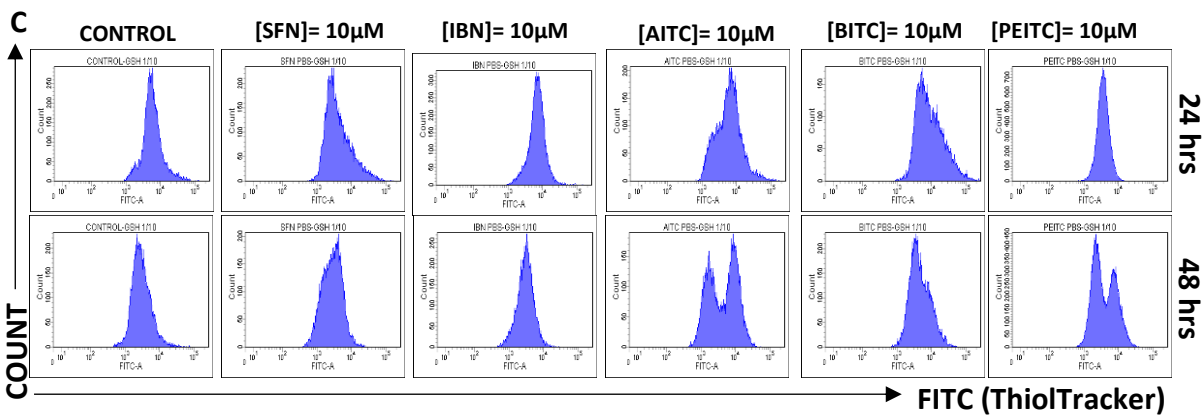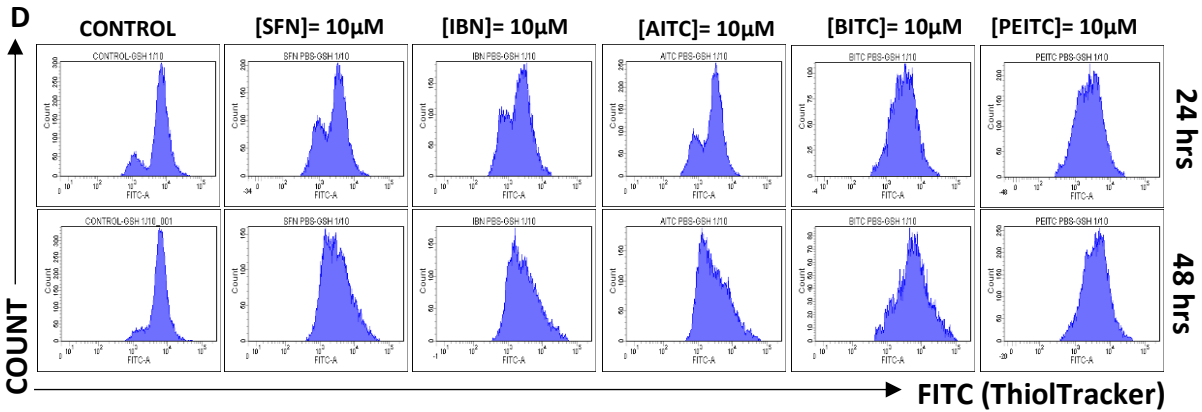

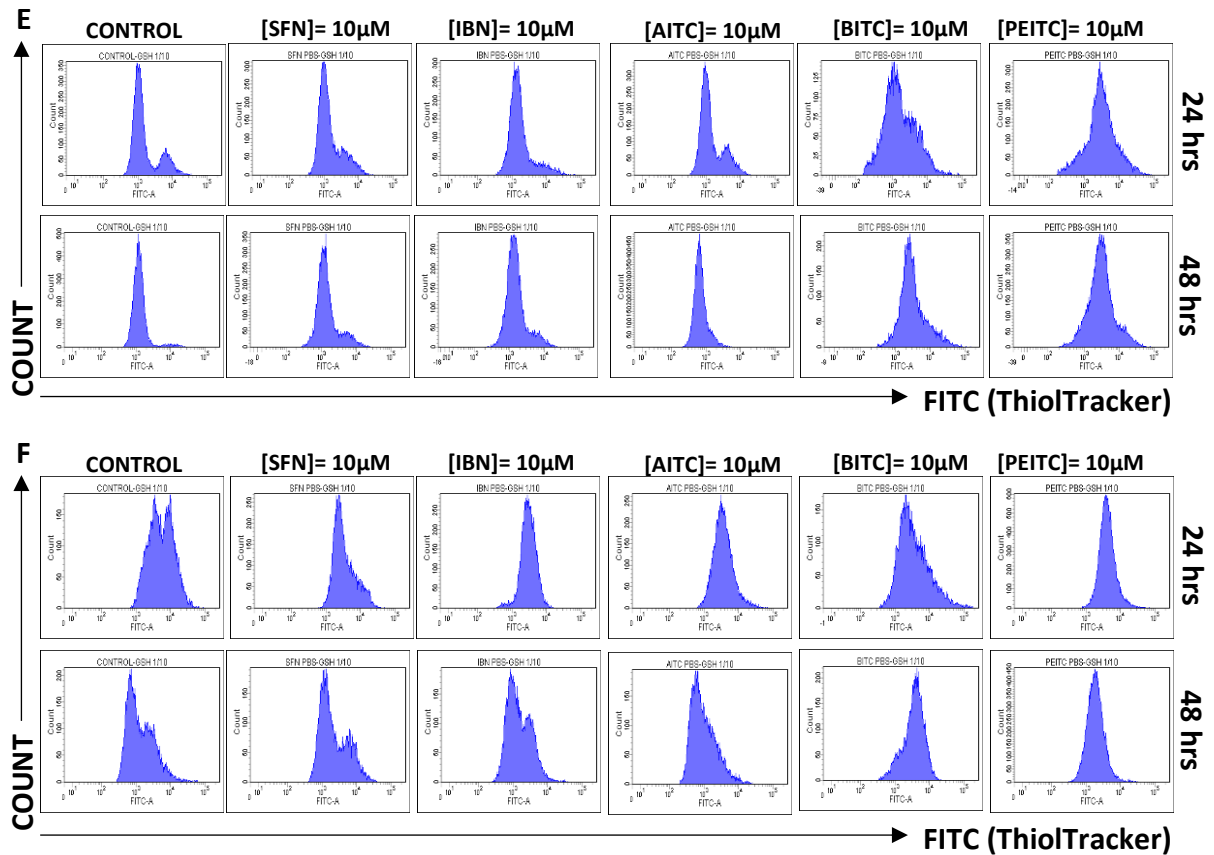

**Figure S2:** The effect of ITCs (SFN, IBN, AITC, BITC, PEITC) on GSH levels in an *in vitro* model of malignant melanoma consisting of (A) human malignant melanoma (A375), (B) murine malignant melanoma (B16F-10), (C) human brain metastatic melanoma (VMM1), (D) human lymph node metastatic melanoma (Hs 294T), (E) human non-melanoma epidermoid carcinoma (A431) and (F) human immortalized keratinocyte (HaCaT) cell lines. Cells were seeded in a 100 mm dish and next day were exposed to 10  $\mu$ M of each ITC for 24 and 48 hrs. Treated cells were incubated with the ThiolTracker fluorescent probe and the levels of GSH were analyzed by using a FACS Canto II flow cytometer (BD Biosciences, San Jose, CA, USA). All data were compared to the respective untreated (control) samples. Representative data from three independent experiments.

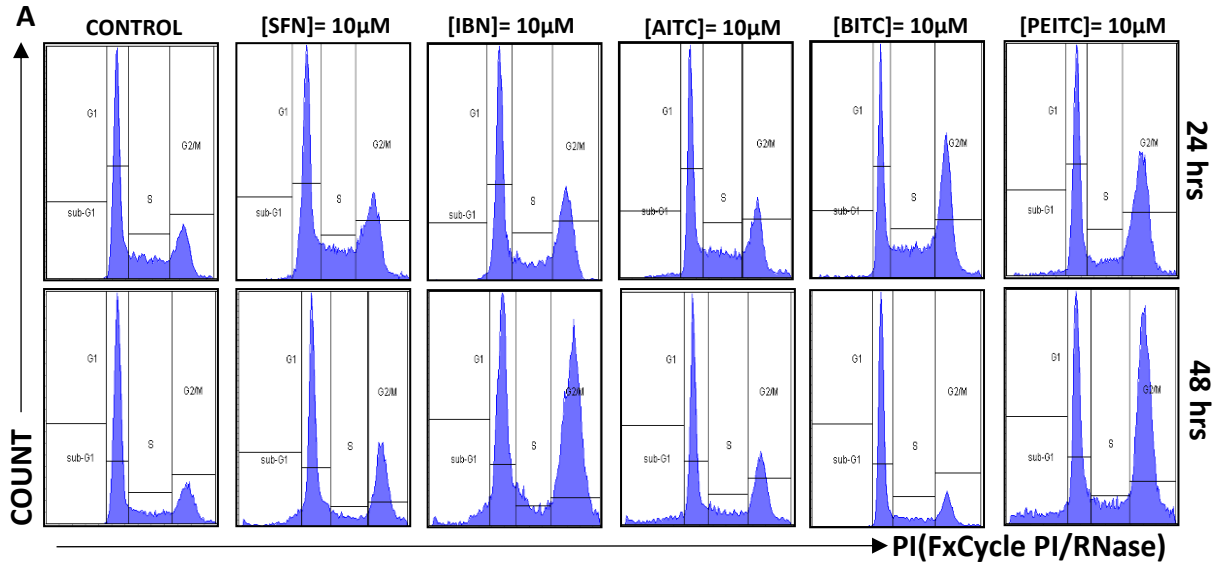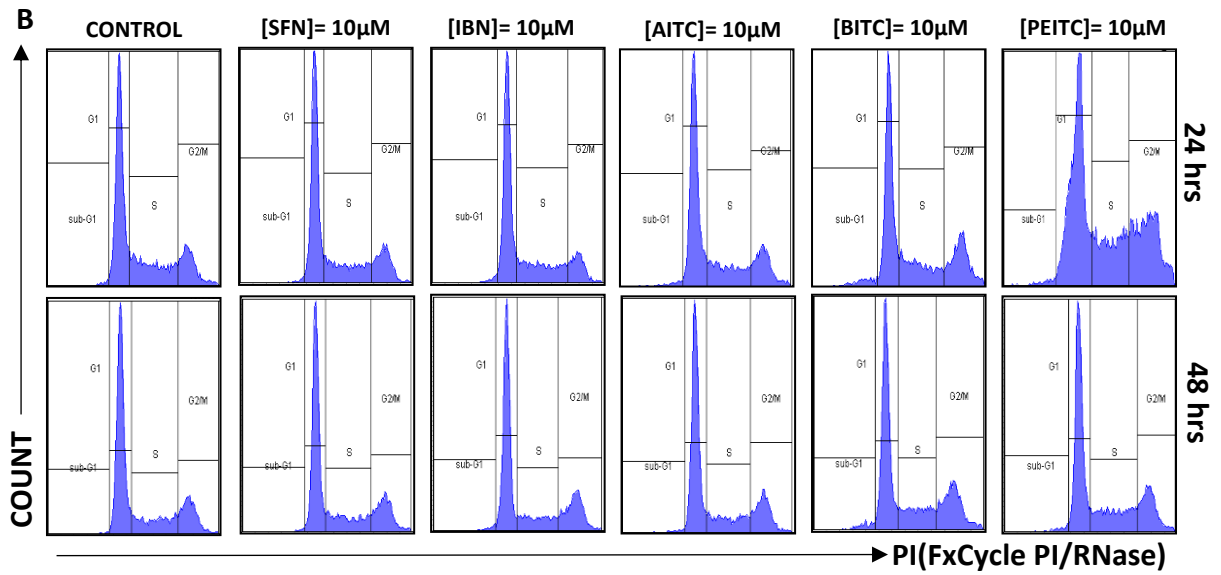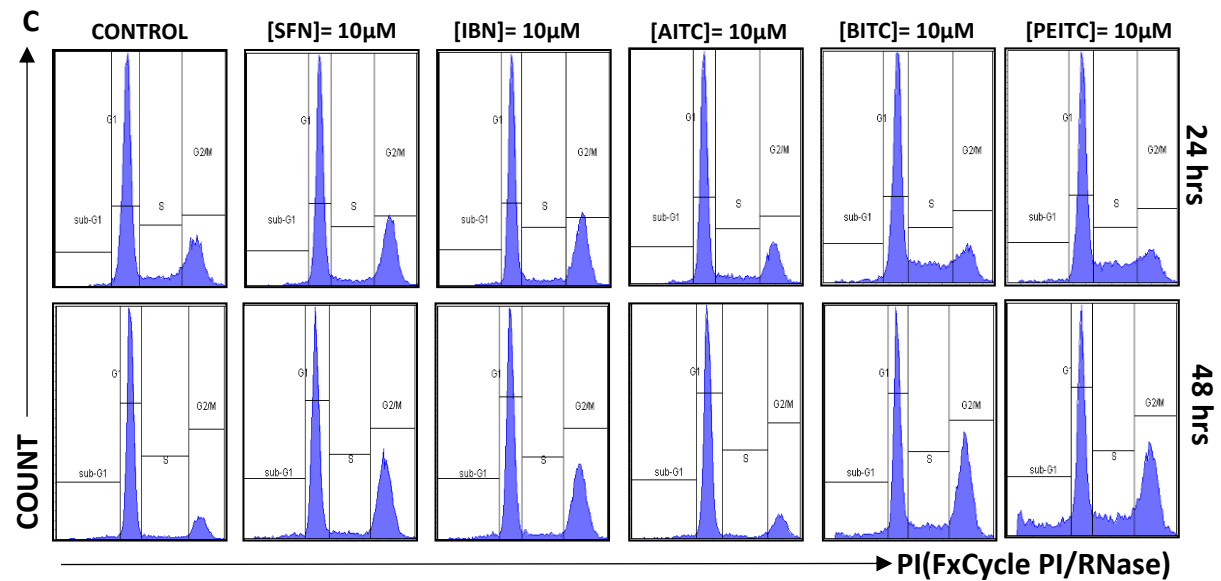

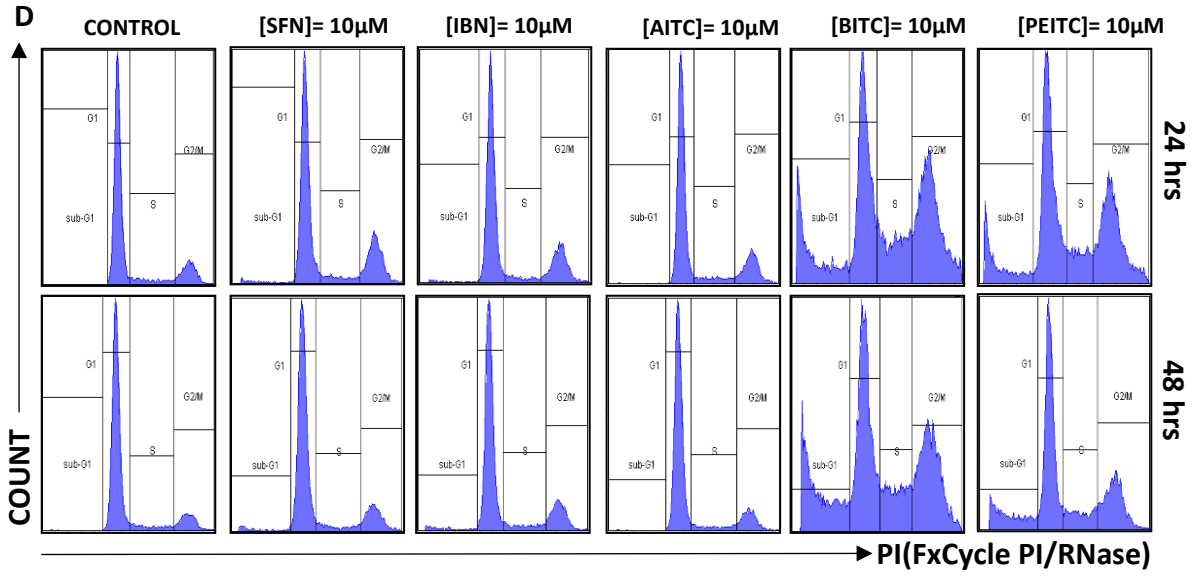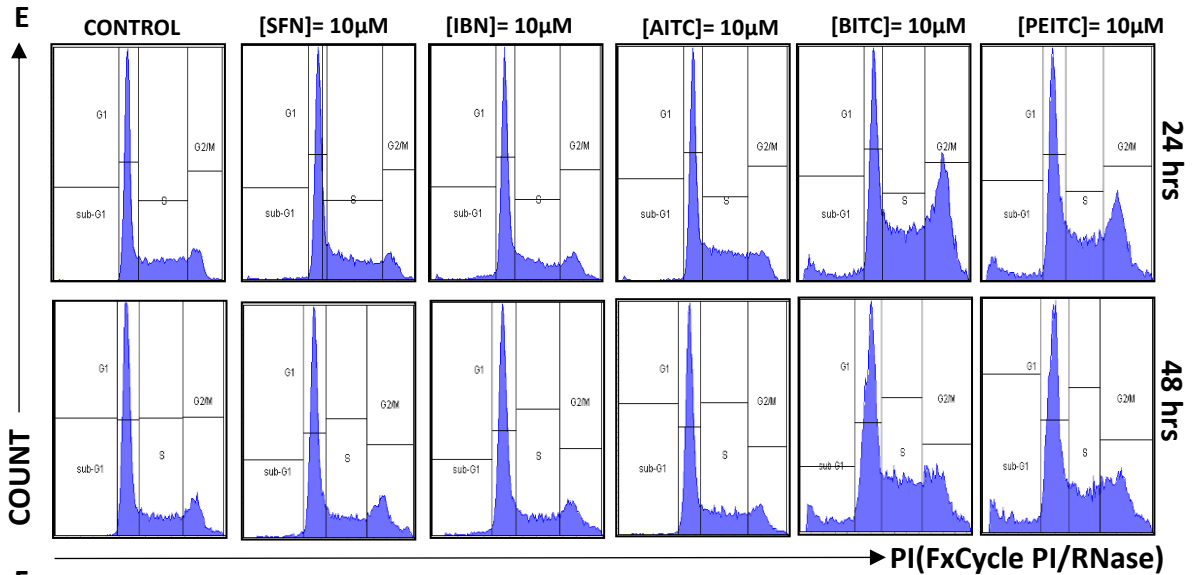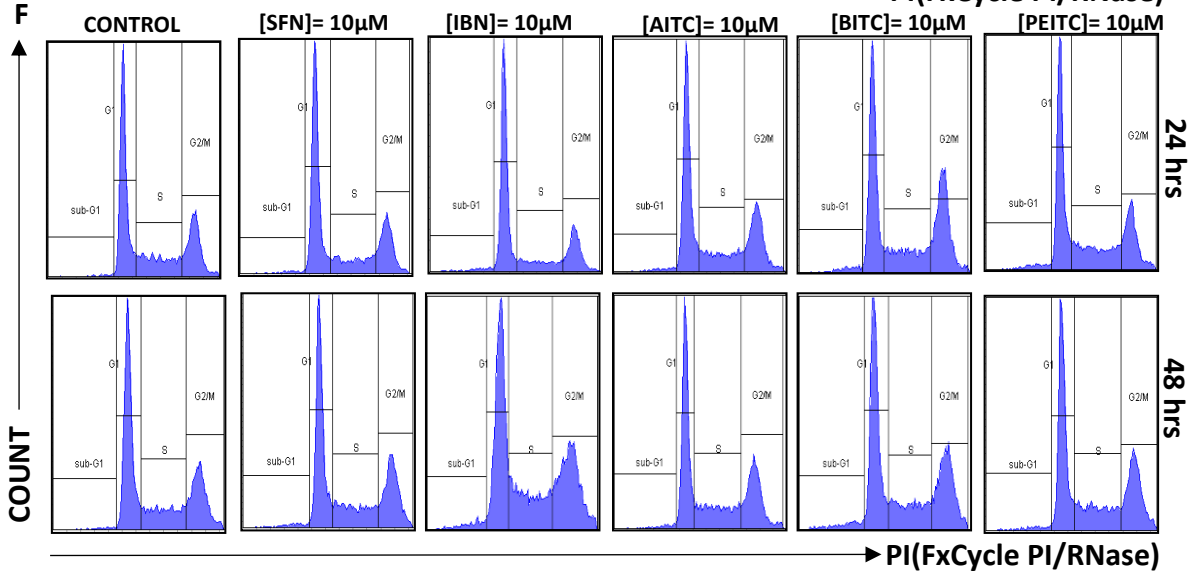

**Figure S3:** The effect of ITCs (SFN, IBN, AITC, BITC, PEITC) on cell cycle in an *in vitro* model of malignant melanoma consisting of (A) human malignant melanoma (A375), (B) murine malignant melanoma (B16F-10), (C) human brain metastatic melanoma (VMM1), (D) human lymph node metastatic melanoma (Hs 294T), (E) human non-melanoma epidermoid carcinoma (A431) and (F) human immortalized keratinocyte (HaCaT) cell lines. Cells were seeded in a 100 mm dish and next day were exposed to 10  $\mu$ M of each ITC for 24 and 48 hrs. Pre-fixed cells were stained with FxCycle PI/RNase fluorescent probe and the DNA content was determined by using a FACS Canto II flow cytometer (BD Biosciences, San Jose, CA, USA). All data were compared to the respective untreated (control) samples. Representative data from three independent experiments.



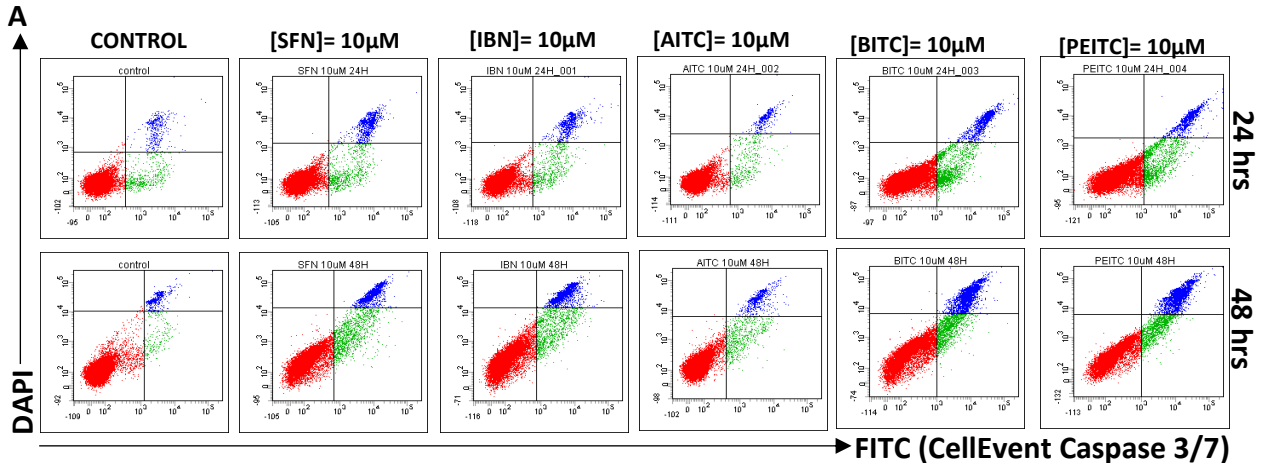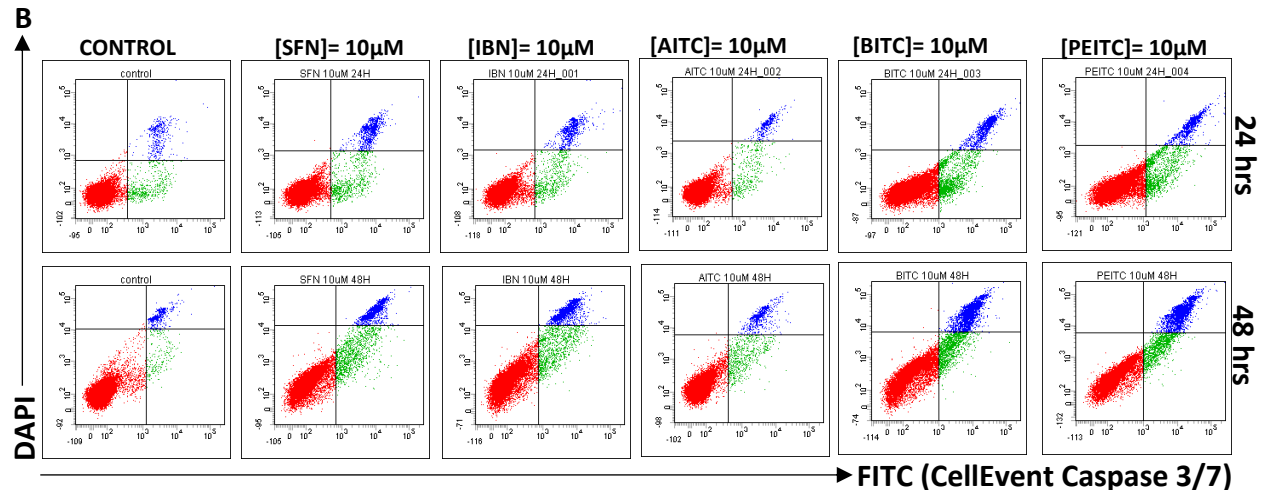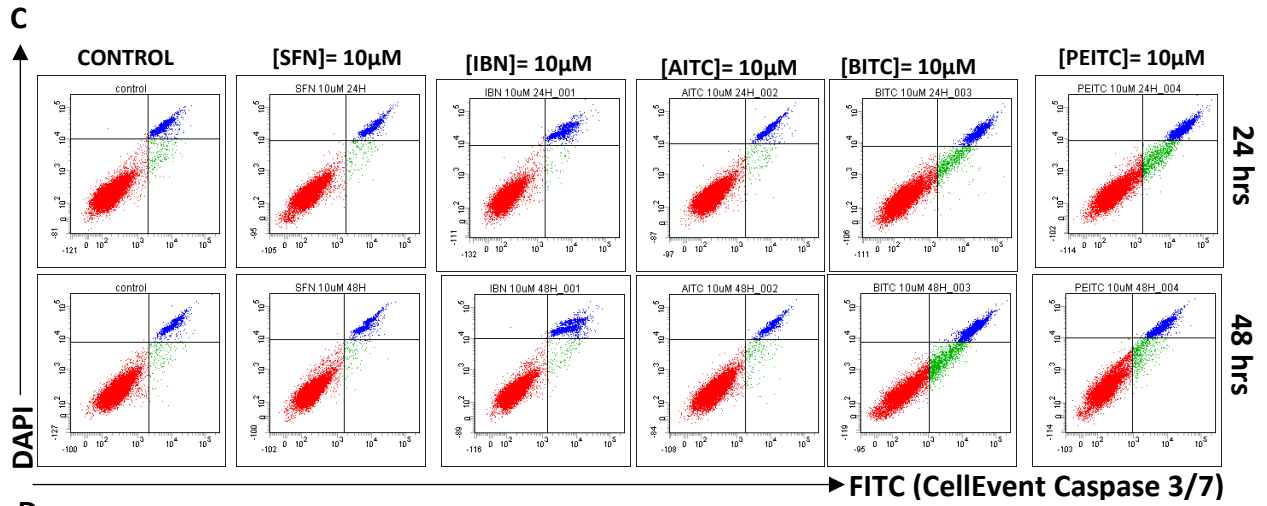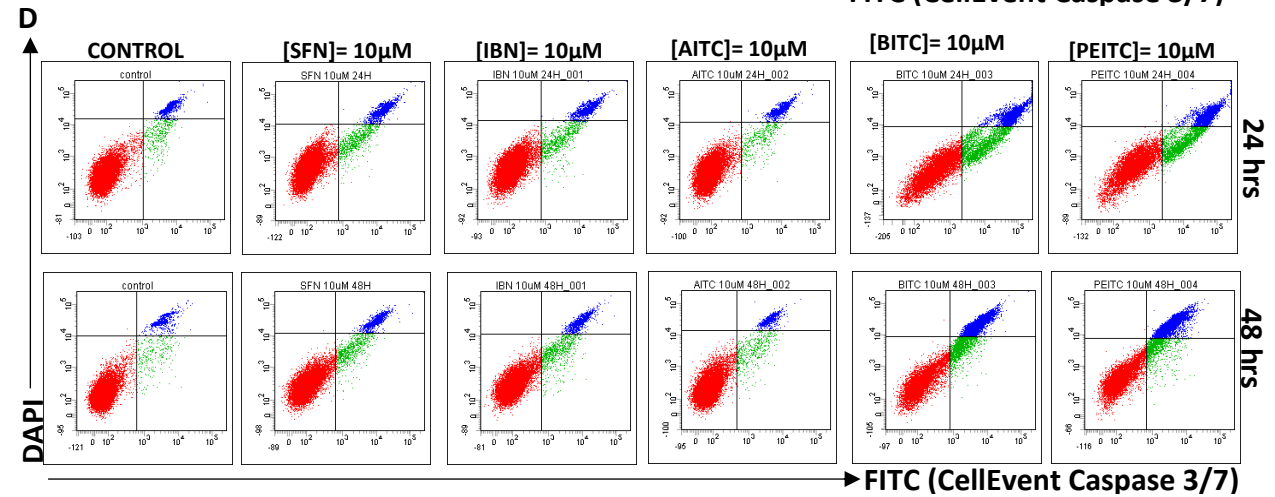

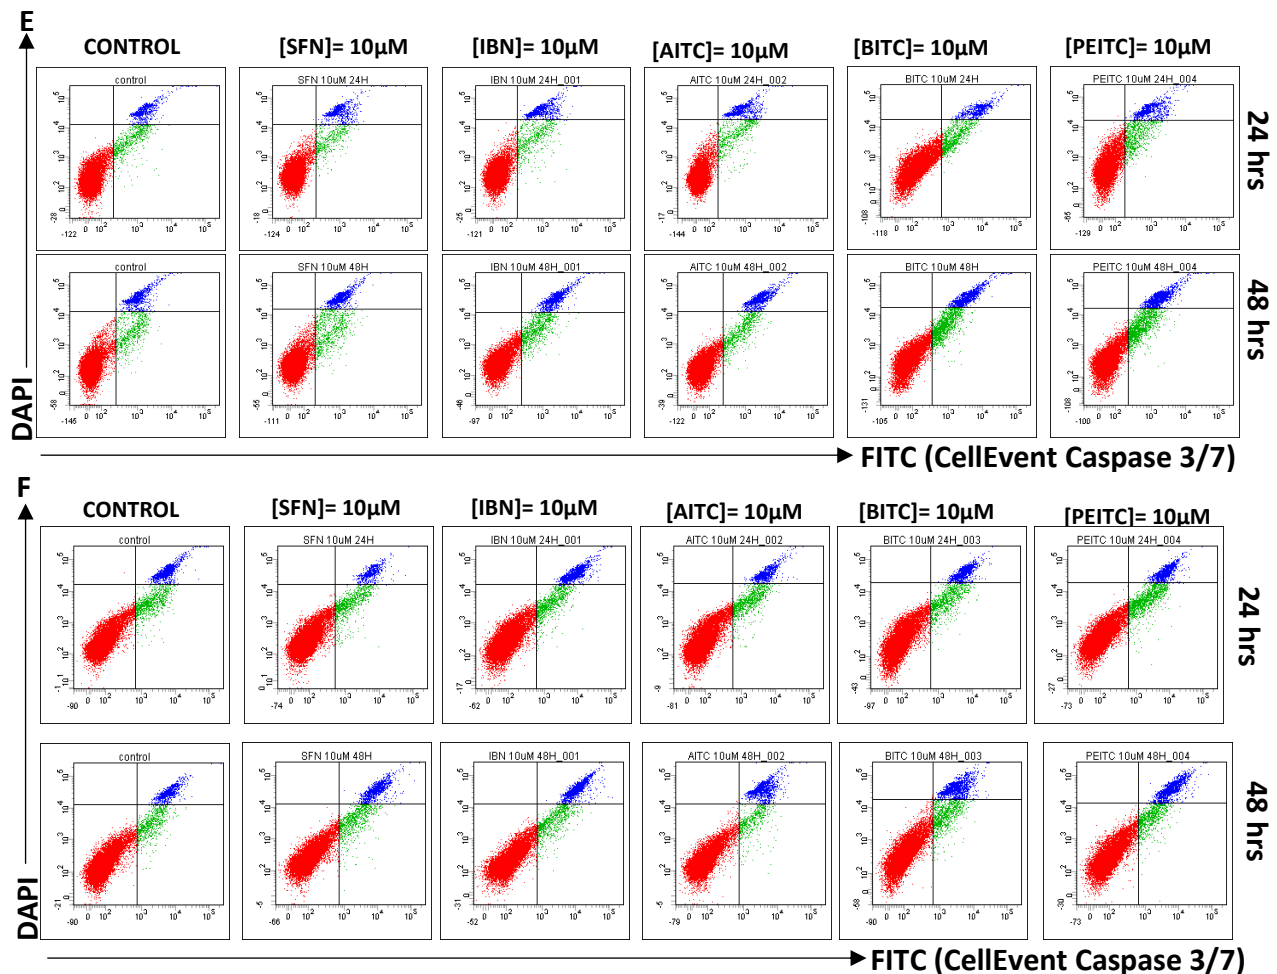

**Figure S4:** The effect of ITCs (SFN, IBN, AITC, BITC, PEITC) to induce apoptosis and/or necrosis in an *in vitro* model of malignant melanoma consisting of (A) human malignant melanoma (A375), (B) murine malignant melanoma (B16F-10), (C) human brain metastatic melanoma (VMM1), (D) human lymph node metastatic melanoma (Hs 294T), (E) human non-melanoma epidermoid carcinoma (A431) and (F) human immortalized keratinocyte (HaCaT) cell lines. Cells were seeded in a 100 mm dish and next day were exposed to 10  $\mu$ M of each ITC for 24 and 48 hrs. Apoptotic and necrotic cell death was measured by the use of CellEvent Caspase 3/7 Green detection reagent and DAPI respectively. All determinations were made by using a FACS Canto II flow cytometer (BD Biosciences, San Jose, CA, USA). All data were compared to the respective untreated (control) samples. Representative data from three independent experiments.
